# Supplementary material for: Born to Eat Wild: An Integrated Conservation Approach to Secure Wild Food Plants for Food Security and Nutrition
Source: MDPI journal article supplement (doi:10.3390/plants9101299), 2020-10-01
Supplement: s1 [file s1]

## Supplementary Materials

**Table S1.** Plant families that include wild food plants (WFPs) and semi-cultivated species that are known to contribute to food and nutrition security in project countries and in the study cases mentioned in this review.

| Plant Family   | Species Name                                                | Common Name                        | Part Eaten/Commercialized         | Range                                                                             |
|----------------|-------------------------------------------------------------|------------------------------------|-----------------------------------|-----------------------------------------------------------------------------------|
| Amaranthaceae  | <i>Amaranthus tortuosus</i>                                 | Amaranth                           | Seeds, leaves                     | S. America, worldwide                                                             |
|                | <i>Chenopodium</i> spp.                                     | Goosefoots                         | Seeds                             | Worldwide                                                                         |
| Anacardiaceae  | <i>Mangifera foetida</i>                                    | Ambacam, Bacang *                  | Fruit                             | Southeast Asia                                                                    |
| Apiaceae       | <i>Foeniculum</i> sp., cf <i>F. vulgare</i>                 | Fennel                             | Bulb, leaves                      | Mediterranean                                                                     |
| Apocynaceae    | <i>Hancornia speciosa</i>                                   | Mangaba *                          | Fruits                            | South America—Brazil, Peru, Bolivia, Paraguay                                     |
| Arecaceae      | <i>Astrocaryum aculeatum</i>                                | Tucumã *                           | Fruits, seeds, leaves, palm heart | S. America—Bolivia, Brazil, Trinidad and Tobago, Venezuela, Guyana, Suriname      |
|                | <i>Butia eriospatha</i>                                     | Wooly Jelly Palm                   | Fruit and seed                    | S. America—Southern Brazil                                                        |
|                | <i>Euterpe edulis</i>                                       | Jussara *                          | Fruit and palm heart              | Brazil                                                                            |
|                | <i>Euterpe oleracea</i>                                     | Açaí palm                          | Fruit and seeds                   | S. America—Brazil                                                                 |
| Asphodelaceae  | <i>Eremurus spectabilis</i>                                 | Foxtail lily                       | Leaves                            | Mediterranean                                                                     |
| Asteraceae     | <i>Scolymus hispanicus</i>                                  | Golden thistle                     | Root, young leaves                | Mediterranean                                                                     |
|                | <i>Porophyllum</i> spp.                                     |                                    | Leaves                            | Mesoamerica                                                                       |
| Athyriaceae    | <i>Diplazium esculentum</i>                                 | Vegetable fern                     | Young leaves                      | Asia, Oceania                                                                     |
| Brassicaceae   | <i>Nasturtium officinale</i>                                | Watercress                         | Leaves                            | Europe, Asia                                                                      |
| Capparaceae    | <i>Capparis spinosa</i> and <i>C. decidua</i>               | Capers                             | Fruits and flowers                | Mediterranean                                                                     |
| Caricaceae     | <i>Vasconcellea microcarpa</i> ( <i>Carica microcarpa</i> ) | Col de monte *                     | Fruit, leaves                     | S. America—Brazil, Bolivia, Peru, Ecuador, Colombia, Venezuela; C. America—Panama |
| Caryocaraceae  | <i>Caryocar brasiliense</i>                                 | Pequi *                            | Fruit, seeds                      | Brazil                                                                            |
| Caulerpaceae   | <i>Caulerpa racemosa</i>                                    | Sea grapes                         | Leaves                            | Worldwide in shallow temperate and tropical seas                                  |
| Cleomaceae     | <i>Cleome gynandra</i>                                      | Spider plant                       | Leaves                            | Africa                                                                            |
| Convolvulaceae | <i>Ipomoea aquatica</i>                                     | Water spinach, water morning glory | Young shoots and leaves           | Southeast Asia                                                                    |

|                            |                                                                       |                                          |                                            |                                                                                                                                          |
|----------------------------|-----------------------------------------------------------------------|------------------------------------------|--------------------------------------------|------------------------------------------------------------------------------------------------------------------------------------------|
| Dennstaedtiaceae           | <i>Hypolepis hostilis</i>                                             | Garabato yuyo<br>*                       | Young shoots                               | Amazonia                                                                                                                                 |
| Dioscoreaceae              | <i>Tacca<br/>leontopetaloides</i>                                     | Arrow root                               | Root                                       | S.E. Asia, Indo-Pacific<br>tropics                                                                                                       |
| Ericaceae                  | <i>Arbutus unedo</i>                                                  | Strawberry<br>tree                       | Fruit                                      | Mediterranean and W.<br>Europe                                                                                                           |
| Euphorbiaceae              | <i>Plukenetia<br/>volubilis</i>                                       | Inca nut                                 | Leaves, seeds                              | S. America—Brazil,<br>Bolivia, Peru,<br>Ecuador, Colombia,<br>Venezuela, Surinam;<br>Caribbean—<br>Windward Isles                        |
|                            | <i>Elateriospermum<br/>tapos</i>                                      | Tapos                                    | Fruits, seeds                              | S.E. Asia—Thailand,<br>Malaysia, Indonesia                                                                                               |
|                            | <i>Schinziophyton<br/>rautanenii</i>                                  | Mongongo<br>tree, or<br>manketti tree    | Fruit and nut                              | Sub-Saharan Africa                                                                                                                       |
| Fabaceae                   | <i>Crotalaria</i> spp.                                                |                                          | Leaves                                     | Mesoamerica                                                                                                                              |
|                            | <i>Dipteryx alata</i>                                                 | Baru                                     | Nut                                        | S. America—<br>Paraguay, Bolivia,<br>Peru, Brazil                                                                                        |
|                            | <i>Neptunia prostrata</i><br>(syn. <i>N. oleracea</i> )               | Water mimosa<br>or sensitive<br>neptunia | Young leaves, shoot tips<br>and young pods | Tropical regions of<br>Africa, S.E. Asia,<br>Australia and S.<br>America                                                                 |
|                            | <i>Tylosema<br/>esculentum</i>                                        | Morama tree                              | Seeds                                      | Southern Africa—<br>Kalahari desert and<br>neighboring sandy<br>regions                                                                  |
| Fagaceae                   | <i>Quercus</i> spp.                                                   | Oak, acorns                              | Acorns                                     | Northern hemisphere                                                                                                                      |
| Lamiaceae (or<br>Labiatae) | <i>Mentha</i> spp.                                                    | Mint                                     | Leaves                                     | Mediterranean                                                                                                                            |
|                            | <i>Origanum<br/>compactum</i> , <i>O.<br/>elongatum</i>               | Oregano                                  | Leaves                                     | Mediterranean                                                                                                                            |
|                            | <i>Salvia Rosmarinus</i><br>(syn. <i>Rosmarinus<br/>officinalis</i> ) | Rosemary                                 | Leaves                                     | Mediterranean                                                                                                                            |
|                            | <i>Salvia</i> spp.                                                    | Sage                                     | Leaves                                     | Mediterranean                                                                                                                            |
|                            | <i>Thymus<br/>satureioides</i>                                        | Savory thyme                             | Leaves                                     | Mediterranean                                                                                                                            |
| Lecythidaceae              | <i>Bertholletia excelsa</i>                                           | Brazil nut                               | Seeds                                      | North and western S.<br>America—Brazil,<br>Venezuela, the<br>Guyanas                                                                     |
| Loganiaceae                | <i>Strychnos<br/>madagascariensis</i>                                 | Black monkey<br>orange                   | Fruit                                      | Eastern and southern<br>Africa—Tanzania,<br>Zambia, Malawi,<br>Zimbabwe,<br>Mozambique,<br>Botswana, Swaziland,<br>S. Africa, Madagascar |

|                |                                                                   |                                                    |                               |                                                                                                                           |
|----------------|-------------------------------------------------------------------|----------------------------------------------------|-------------------------------|---------------------------------------------------------------------------------------------------------------------------|
| Malvaceae      | <i>Adansonia digitata</i>                                         | Baobab                                             | Fruit, seeds                  | Tropical Africa—<br>Mauritania to Sudan,<br>south to Angola and<br>Tanzania                                               |
|                | <i>Anoda</i> spp.                                                 |                                                    |                               | Mesoamerica                                                                                                               |
|                | <i>Chorchorus<br/>olitorius</i>                                   | Jew's mallow                                       | Leaves                        | Africa, Asia                                                                                                              |
|                | <i>Lavandula dentata</i>                                          | Fringed<br>lavender                                | Leaves                        | Mediterranean                                                                                                             |
|                | <i>Malva sylvestris</i>                                           | Mallow                                             | Leaves                        | Mediterranean                                                                                                             |
| Moraceae       | <i>Morus</i> spp.                                                 | Mulberries                                         | Fruits                        | Worldwide in<br>temperate regions                                                                                         |
| Oleaceae       | <i>Fraxinus dimorpha</i>                                          | Ash tree                                           | Fruits and seeds              | Mediterranean                                                                                                             |
| Pandanaceae    | <i>Pandanus brosimos</i>                                          | Karuka *                                           | Nuts                          | Australasia—Papua<br>New Guinea                                                                                           |
| Phyllanthaceae | <i>Uapaca kirkiana</i>                                            | Sugar plum or<br>mahobohobo                        | Fruit                         | African tropics                                                                                                           |
|                | <i>Sauropus<br/>androgynus</i>                                    | Katuk, star<br>gooseberry, or<br>sweet leaf        | Leaves, flowers and<br>fruits | E. Asia—India,<br>Bangladesh, S. China<br>to Indonesia, Vietnam                                                           |
| Polygonaceae   | <i>Rumex</i> spp.                                                 | Docks and<br>sorrels                               | Leaves                        | Mediterranean                                                                                                             |
| Portulacaceae  | <i>Portulaca</i> spp.                                             | Purslane                                           | Leaves                        | Mesoamerica                                                                                                               |
| Rhamnaceae     | <i>Ziziphus jujube</i>                                            | Jujube                                             | Fruits                        | S. Asia, S.E. Europe                                                                                                      |
| Rosaceae       | <i>Rubus</i> spp.                                                 | Raspberries,<br>blackberries,<br>and<br>dewberries | Fruits, leaves                | Worldwide                                                                                                                 |
| Rutaceae       | <i>Limonia acidissima</i>                                         | Wood-apple<br>and elephant-<br>apple               | Fruit                         | Andaman Islands,<br>Bangladesh, India and<br>Sri Lanka                                                                    |
| Sapotaceae     | <i>Sideroxylon<br/>spinosum</i> (syn.<br><i>Argania spinosa</i> ) | Argan                                              | Nuts                          | Northwest Africa—<br>Algeria, Morocco,<br>Western Sahara,<br>Mauritania                                                   |
|                | <i>Pouteria multiflora</i>                                        | Bullytree                                          | Fruit                         | S. America—N. Brazil,<br>Peru, Ecuador,<br>Colombia, Venezuela;<br>C. America—Panama;<br>Caribbean—Trinidad<br>to Jamaica |
| Solanaceae     | <i>Solanum</i> spp.                                               | Nightshades                                        | Leaves                        | Africa, Americas                                                                                                          |

Note: Species' names were reconciled against Kew's Plants of the World Online (POWO; <http://www.plantsoftheworldonline.org/>). \* Where no common name is available the local name was given.

**Table S2.** Summary of actions that can be undertaken across the four pillars by the main stakeholders involved in WFP conservation and use.

|        | Governments                                                                                                                                                                                                                                                                                                                                                             | Research Organizations/<br>Academia                                                                                                                                                                                                                                                                                                                                                                                                                        | NGOs                                                                                                                                                                                                   | WFP collectors                                                                                                                                                                      | Private sector/Retailers                                                                                                        | Consumers                                                                      |
|--------|-------------------------------------------------------------------------------------------------------------------------------------------------------------------------------------------------------------------------------------------------------------------------------------------------------------------------------------------------------------------------|------------------------------------------------------------------------------------------------------------------------------------------------------------------------------------------------------------------------------------------------------------------------------------------------------------------------------------------------------------------------------------------------------------------------------------------------------------|--------------------------------------------------------------------------------------------------------------------------------------------------------------------------------------------------------|-------------------------------------------------------------------------------------------------------------------------------------------------------------------------------------|---------------------------------------------------------------------------------------------------------------------------------|--------------------------------------------------------------------------------|
| Inform | <p>Undertake <b>policy analysis</b> of:</p> <ul style="list-style-type: none"> <li>• International agreements entered into, relevant to WFPs (e.g. CBD, ITPGRFA, GSPC, CITES</li> <li>• National legal frameworks relevant to WFPs</li> <li>• National biodiversity strategy and action plan</li> <li>• National and international information system on WFP</li> </ul> | <p>Provide the <b>background</b> context for WFPs:</p> <ul style="list-style-type: none"> <li>• Situation of WFP conservation in the country. Occurrence inside and outside protected areas, in situ actions affecting WFPs; representation in genebanks, assessments of use, trade and threat status</li> <li>• Identification of stakeholders that benefit from use of WFPs (indigenous communities, value chain actors, consumers, breeders)</li> </ul> | <p>Identify <b>key informants</b> or custodians of biodiversity that can act as <b>key change agents</b> or community mobilizers</p>                                                                   | <p>Engage in citizen science:</p> <ul style="list-style-type: none"> <li>• provide data on WFP abundance/distribution</li> <li>• participate in food consumption surveys</li> </ul> | <p>Companies to review what supply chains rely on wild plant ingredients, assess their ecological and social sustainability</p> | <p>Be mindful of food and well-being products that contain WFP ingredients</p> |
|        | <p>Undertake a <b>gap analysis</b> to establish where gaps exist in conservation measures and sustainable use (e.g. governance, land rights, wildlife legislation)</p>                                                                                                                                                                                                  | <p>Compile a <b>national inventory</b> of WFPs. From the national inventory, select a list of priority species that will be the focus of promotion and conservation activities</p>                                                                                                                                                                                                                                                                         | <p><b>Mobilize</b> communities to take part in information gathering and <b>report back</b> to communities (and governments) once information is analyzed as part of standard development practice</p> |                                                                                                                                                                                     |                                                                                                                                 |                                                                                |

|                 |                                                                                                                                       |                                                                                                                                                                                                                                                                                                                                                                                       |                                                                                                                                                                     |                                                                                                                                    |                                                                                                                                                             |                                                                                                            |
|-----------------|---------------------------------------------------------------------------------------------------------------------------------------|---------------------------------------------------------------------------------------------------------------------------------------------------------------------------------------------------------------------------------------------------------------------------------------------------------------------------------------------------------------------------------------|---------------------------------------------------------------------------------------------------------------------------------------------------------------------|------------------------------------------------------------------------------------------------------------------------------------|-------------------------------------------------------------------------------------------------------------------------------------------------------------|------------------------------------------------------------------------------------------------------------|
|                 | Enable effective <b>regulation</b> of wild-harvesting and incentivize adherence to <b>certification</b> schemes                       | <p>Review <b>existing national/regional</b> data sources on WFPs:</p> <ul style="list-style-type: none"> <li>• food composition and consumption data</li> <li>• traditional knowledge</li> <li>• importance for food security</li> </ul>                                                                                                                                              | Promote the <b>marketing and consumption</b> of biodiverse or biodiversity-friendly products                                                                        | Continue valuing traditional foods and add economic value to WFPs derived products using new information, innovation or processing | Build targets to demonstrate commitment to moving supply chains to verifiable sustainability, and implement third-party standards and certification schemes | Consider the nutritional and health benefits of WFPs and their products                                    |
| <b>Value</b>    | Increase <b>research support</b> to enhance the visibility of WFPs and their contribution to diets/livelihoods/economies/biodiversity | <p>Carry out a <b>baseline assessment</b> for the priority species, including:</p> <ul style="list-style-type: none"> <li>• ecogeographic status and threat assessment</li> <li>• socio-economic status of consumers, food culture, local knowledge, food security; cultural and health contexts</li> <li>• cultural food list data, food use and nutrient intake patterns</li> </ul> | Assist community actors in <b>value chain development</b> for WFPs, to create markets for biodiversity-derived products that are collected and managed sustainably  | Adhere to certification standards and schemes                                                                                      |                                                                                                                                                             |                                                                                                            |
| <b>Conserve</b> | Put in place <b>national strategies</b> , plans or programmes to address the conservation and sustainable use of WFPs                 | For species requiring <i>ex situ</i> conservation, propose <b>sampling and storage</b> in national or international genebanks, botanic gardens or other long-term facilities                                                                                                                                                                                                          | Advocate policies that favor <b>sustainable approaches to collection/consumption</b> (e.g. local food movements; farmers' markets; participatory guarantee systems) | Revive related customary rules or follow new guidelines to sustainably harvest WFPs                                                | Develop/integrate the requirements of sustainable sourcing and trade in existing standards                                                                  | Reduce pressure on WFPs by consumers choice (e.g. buying fair trade and supporting best practices (such as |

|                |                                                                              |                                                                                                                                                                                                                                                                                 |                                                                                                                                             |                                                                                      |                                                                                                    |
|----------------|------------------------------------------------------------------------------|---------------------------------------------------------------------------------------------------------------------------------------------------------------------------------------------------------------------------------------------------------------------------------|---------------------------------------------------------------------------------------------------------------------------------------------|--------------------------------------------------------------------------------------|----------------------------------------------------------------------------------------------------|
|                |                                                                              |                                                                                                                                                                                                                                                                                 |                                                                                                                                             |                                                                                      | FairWild-certified products)                                                                       |
|                | Integrate the <b>management</b> of WFPs into relevant cross-cutting policies | Propose <b>complementary actions</b> to protect WFPs outside protected areas, such as easements, incentive-based schemes or micro-reserves.                                                                                                                                     | Promote <b>sustainable management and collection</b> practices based on customary management, national regulations or certification schemes | Engage in community seedbanks and complementary activities to conserve WFPs          |                                                                                                    |
| <b>Educate</b> | Implement <b>research and education</b> programmes with a focus on WFPs      | Develop guidelines for <b>sustainable harvest/management</b> . For priority species, outline <i>in situ</i> conservation action (including threat management), both within protected areas, preferably as a network of genetic reserves, and outside currently protected areas. | Partner with relevant ministries to undertake <b>nutrition education</b> programmes that foster the sustainable use of WFPs                 | Pass on traditional knowledge and train youth to sustainable collect and manage WFPs | Take part in nature walks, food festivals and cooking demonstration that enhance the value of WFPs |
